# Supplementary material for: Comprehensive Analysis of the Expressionand Prognosis for TDO2 in Breast Cancer
Source: PubMed Central journal article supplement — Mol Ther Oncolytics. 2020 Mar 30;17:153–68. doi: 10.1016/j.omto.2020.03.013 (PMC7178007; doi:10.1016/j.omto.2020.03.013), 2020-03-30
Supplement: mmc3.pdf [file mmc3.pdf]

32 Genes in the superpathway of tryptophan utilization SuperPath

SULT1A2

SULT1A1

QPRT

NADSYN1

NMNAT1

CYP1A2

CYP1B1

CYP2A6

CYP2C19

MAOA

POR

CYP2S1

CYP2U1

CYP4X1

NMNAT3

TDO2

KMO

KYNU

HAAO

AFMID

DDC

MAOB

AKR1A1

IDO1

IDO2

ADH1B

ADH6

ALDH2

AANAT

TPH1

TPH2

ACMSD
